# Supplementary material for: Young Creators: Perceptions of Creativity by Primary School Students in Malta
Source: MDPI journal article supplement (doi:10.3390/jintelligence11030053), 2023-03-13
Supplement: s1 [file s1]

Supplementary Material

# Young Creators: Perceptions of Creativity by Primary School Students in Malta

Table S1. Correlation Analysis

|    | 1        | 2        | 3       | 4       | 5        | 6       | 7        | 8       | 9       | 10      | 11      | 12      | 13       | 14      | 15      | 16      | 17      | 18      | 19      | 20      | 21 |
|----|----------|----------|---------|---------|----------|---------|----------|---------|---------|---------|---------|---------|----------|---------|---------|---------|---------|---------|---------|---------|----|
| 1  | 1        |          |         |         |          |         |          |         |         |         |         |         |          |         |         |         |         |         |         |         |    |
| 2  | -0.3900* | 1        |         |         |          |         |          |         |         |         |         |         |          |         |         |         |         |         |         |         |    |
| 3  | 0.3333*  | -0.7382* | 1       |         |          |         |          |         |         |         |         |         |          |         |         |         |         |         |         |         |    |
| 4  | -0.0663  | -0.0008  | 0.0494  | 1       |          |         |          |         |         |         |         |         |          |         |         |         |         |         |         |         |    |
| 5  | 0.0663   | 0.0008   | -0.0494 | -1      | 1        |         |          |         |         |         |         |         |          |         |         |         |         |         |         |         |    |
| 6  | -0.0396  | 0.082    | -0.0549 | -0.007  | 0.007    | 1       |          |         |         |         |         |         |          |         |         |         |         |         |         |         |    |
| 7  | 0.0217   | -0.0568  | 0.0423  | 0.2124* | -0.2124* | 0.1186  | 1        |         |         |         |         |         |          |         |         |         |         |         |         |         |    |
| 8  | 0.1075   | 0.0028   | -0.0816 | -0.064  | 0.064    | 0.0589  | -0.2366* | 1       |         |         |         |         |          |         |         |         |         |         |         |         |    |
| 9  | -0.0611  | 0.0731   | -0.0301 | 0.0682  | -0.0682  | 0.0474  | -0.2447* | 0.0946  | 1       |         |         |         |          |         |         |         |         |         |         |         |    |
| 10 | 0.0954   | 0.0148   | -0.085  | -0.0862 | 0.0862   | 0.0271  | -0.0824  | 0.0279  | 0.0013  | 1       |         |         |          |         |         |         |         |         |         |         |    |
| 11 | -0.1255  | 0.1156   | -0.0264 | -0.0321 | 0.0321   | -0.0617 | 0.0706   | 0.1094  | 0.0263  | 0.2197* | 1       |         |          |         |         |         |         |         |         |         |    |
| 12 | 0.0892   | -0.1225  | 0.0601  | 0.0664  | -0.0664  | 0.0516  | -0.0389  | 0.1214  | 0.0261  | 0.1715* | 0.9234* | 1       |          |         |         |         |         |         |         |         |    |
| 13 | -0.0696  | -0.1528  | 0.2074* | 0.0242  | -0.0242  | -0.0537 | -0.0105  | 0.035   | 0.0756  | 0.0312  | -0.119  | 0.1079  | 1        |         |         |         |         |         |         |         |    |
| 14 | 0.1175   | -0.1323  | 0.0494  | 0.2069* | -0.2069* | 0.0672  | 0.0543   | 0.0046  | 0.005   | 0.0125  | -0.1227 | 0.119   | -0.6186* | 1       |         |         |         |         |         |         |    |
| 15 | 0.0862   | -0.0349  | -0.0275 | -0.0384 | 0.0384   | -0.0216 | -0.0083  | 0.0885  | -0.0516 | 0.0275  | -0.0286 | 0.0181  | -0.1129  | 0.3425* | 1       |         |         |         |         |         |    |
| 16 | 0.0252   | -0.0375  | 0.0198  | 0.0356  | -0.0356  | 0.0187  | -0.0354  | -0.0196 | 0.0324  | 0.0601  | 0.0058  | -0.0295 | -0.0256  | 0.0668  | -0.0295 | 1       |         |         |         |         |    |
| 17 | 0.0475   | 0.0321   | -0.0677 | 0.1024  | -0.1024  | -0.0688 | -0.0243  | 0.0056  | 0.0698  | 0.0391  | 0.0481  | 0.0639  | -0.0733  | 0.1102  | 0.1408  | 0.3699* | 1       |         |         |         |    |
| 18 | 0.0574   | 0.0898   | -0.1338 | 0.0721  | -0.0721  | -0.076  | -0.0094  | 0.0073  | 0.0479  | 0.0267  | 0.0571  | -0.0681 | 0.0135   | 0.0107  | -0.108  | 0.3507* | 0.5080* | 1       |         |         |    |
| 19 | 0.018    | 0.0746   | -0.0894 | 0.1249  | -0.1249  | -0.0837 | -0.0039  | 0.0189  | 0.0797  | 0.0255  | 0.0687  | -0.0794 | -0.0056  | -0.0226 | -0.0229 | 0.4479* | 0.5528* | 0.6398* | 1       |         |    |
| 20 | 0.0661   | 0.0127   | -0.0615 | 0.0042  | -0.0042  | -0.0265 | 0.0126   | -0.0292 | 0.046   | 0.0492  | -0.0265 | 0.0074  | -0.0249  | 0.0075  | 0.0123  | 0.1367  | 0.2089* | 0.2497* | 0.2769* | 1       |    |
| 21 | 0.0561   | 0.0595   | -0.1017 | 0.1058  | -0.1058  | -0.0783 | -0.006   | -0.0174 | 0.0772  | 0.0532  | 0.0558  | -0.0775 | -0.0336  | 0.0501  | -0.0984 | 0.6364* | 0.7760* | 0.7949* | 0.8530* | 0.4534* | 1  |

1 = State Schools; 2 = Church Schools; 3 = Independent Schools; 4 = School Year 5; 5 = School Year 6; 6 = Sector OQ; 7 = Favorite Subject Mathematics; 8 = Favorite Subject English; 9 = Favorite Subject Sciences; 10 = Online Delivery of Classes; 11 = Classes at School; 12 = Hybrid Delivery of Classes; 13 = No Siblings; 14 = 1-2 Siblings; 15 = 3 or more Siblings; 16 = Item 1 CPI; 17 = Item 2 CPI; 18 = Item 3 CPI; 19 = Item 4 CPI; 20 = Item 5 CPI; 21 = Overall CPI Score

**Table S2. Questionnaire**

|                                                                                                                                                                                                                                                                                                                                                                                                                                                                                                              |
|--------------------------------------------------------------------------------------------------------------------------------------------------------------------------------------------------------------------------------------------------------------------------------------------------------------------------------------------------------------------------------------------------------------------------------------------------------------------------------------------------------------|
| <p><i>Section 1: Demographic Data</i></p> <p>Which school are you at?</p> <p>State</p> <p>Church</p> <p>Independent</p> <p>Which year are you in?</p> <p>Year 5</p> <p>Year 6</p> <p>What job do the people who look after you do?</p> <p>What is your favorite subject?</p> <p>Which one best describes your experience at school?</p> <p>All lessons online</p> <p>All lessons are at school</p> <p>We have a mix of online and face-to-face lessons</p> <p>How many brothers and sisters do you have?</p> |
| <p><i>Section 2: SSCS Items for Creative Personal Identity (CPI)</i></p> <p>I think I am a creative person</p> <p>My creativity is important for who I am</p> <p>Being a creative person is important to me</p> <p>Creativity is an important part of myself</p> <p>Finding a solution is a characteristic which is important to me</p>                                                                                                                                                                      |
| <p><i>Section 3: Open- and closed-ended questions</i></p> <p>What is creativity?</p> <p>Are you creative?</p> <p>When are you creative most?</p> <p>Is school a place where you can be creative?</p> <p>When are you most creative during the school day?</p> <p>What would help you to be more creative while at school?</p> <p>What was the most creative thing you ever did at school?</p> <p>Why do you think it was creative?</p>                                                                       |
